# Supplementary material for: Role of direct and indirect social and spatial ties in the diffusion of HIV and HCV among people who inject drugs: a cross-sectional community-based network analysis in New Delhi, India
Source: eLife journal article supplement (doi:10.7554/elife.69174), 2021-08-02
Supplement: repstand2 [file elife-69174-repstand2-v2.pdf]

**Assessed for Eligibility**  
n = 2,644

**Duplicate Participant  
Already Enrolled**  
n = 132

**Total Enrolled**  
n = 2,512

**Data Available for Analysis**  
n = 2,512
